# Supplementary material for: Germinal center hypoxia in tumor-draining lymph nodes negatively regulates tumor-induced humoral immune responses in mouse models of breast cancer
Source: PubMed Central journal article supplement — Oncoimmunology. 2021 Aug 4;10(1):1959978. doi: 10.1080/2162402X.2021.1959978 (PMC8344742; doi:10.1080/2162402x.2021.1959978), 2021-08-04
Supplement: KONI_A_1959978_SM5943.pdf [file KONI_A_1959978_SM5943.pdf]

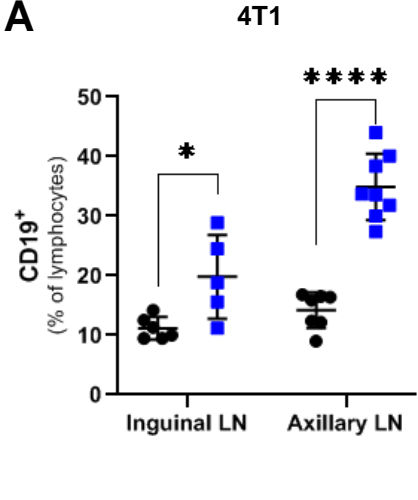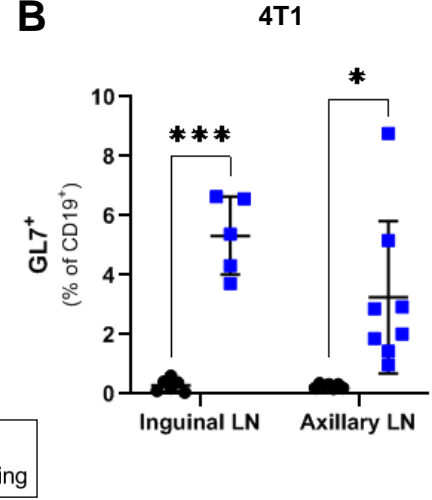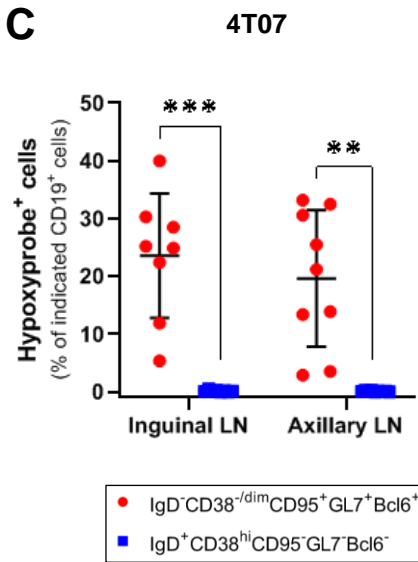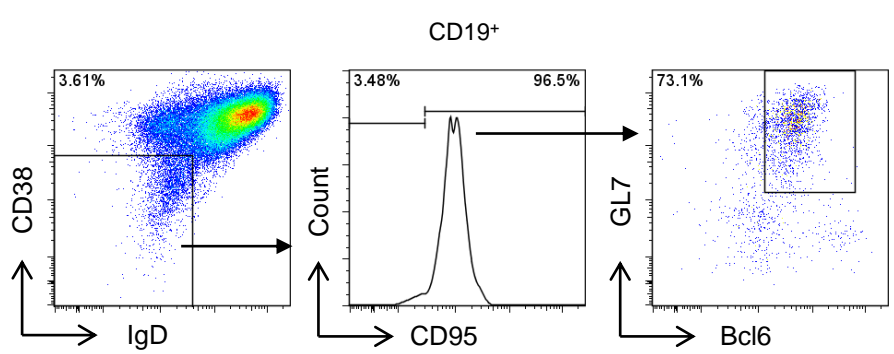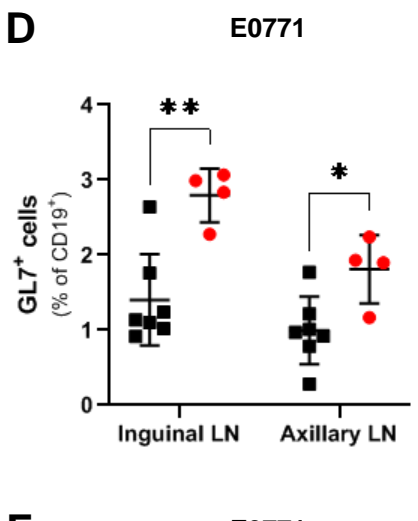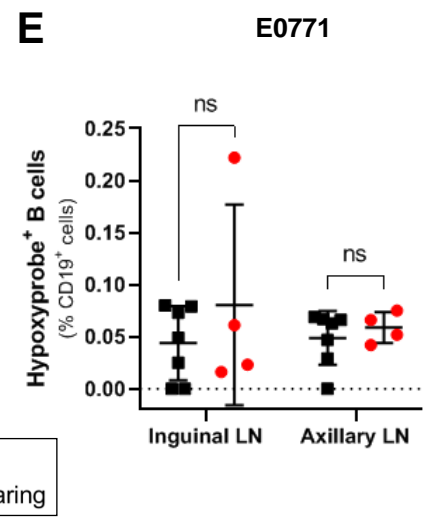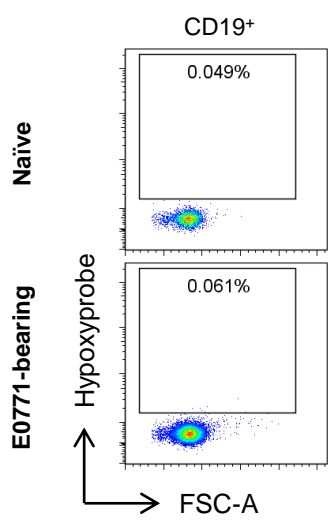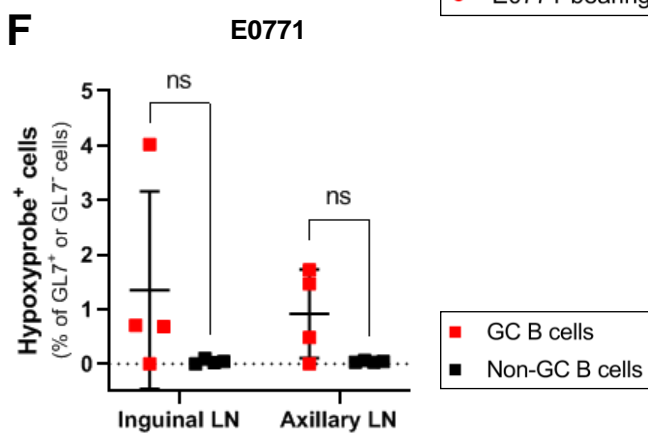

Supplemental Figure 1

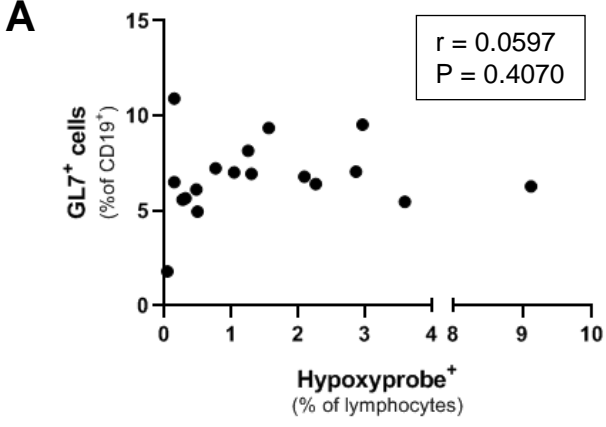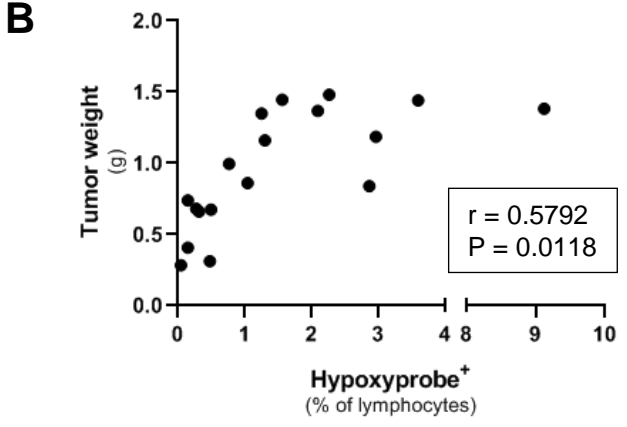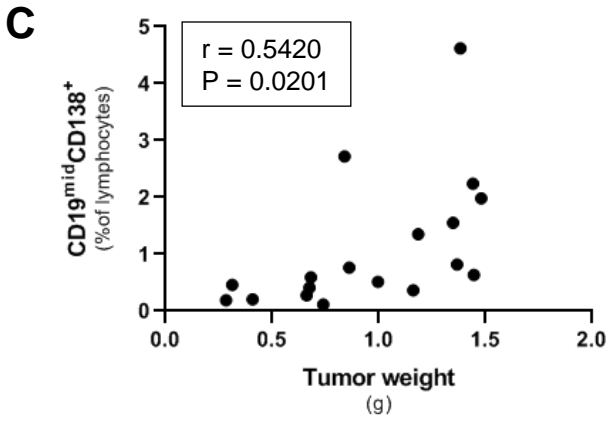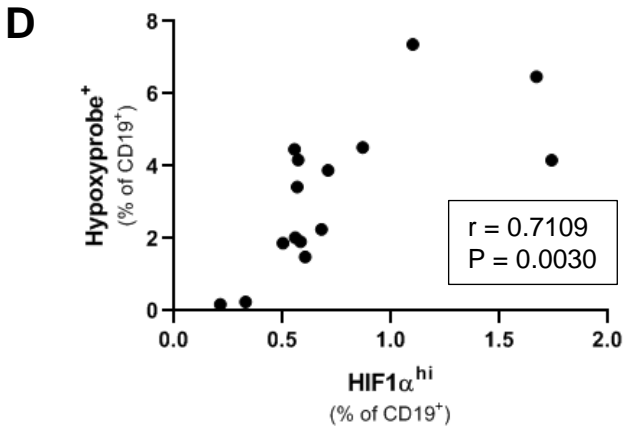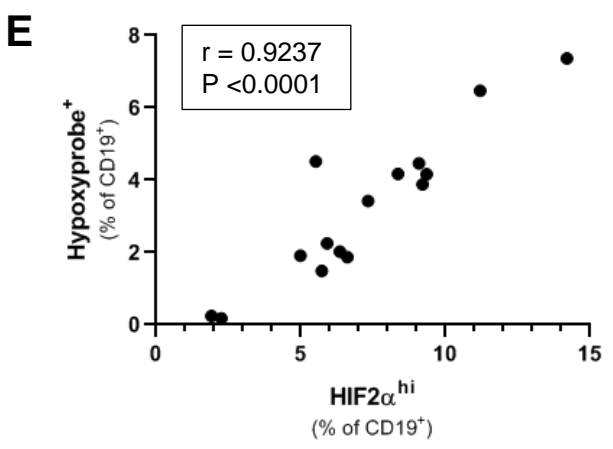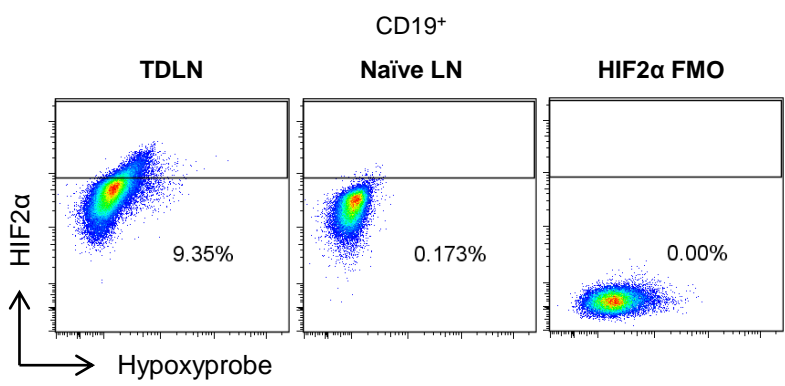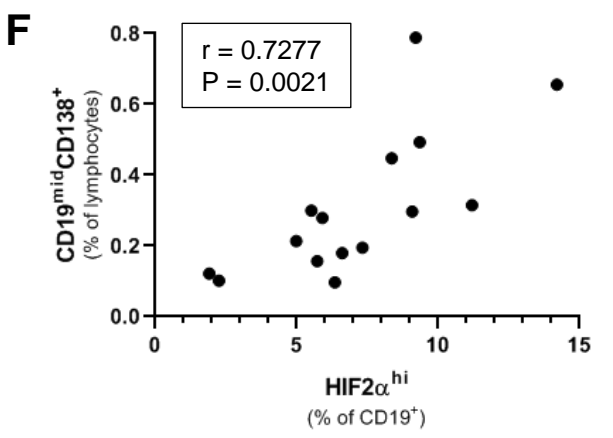

Supplemental Figure 2

**A**

C57BL/6

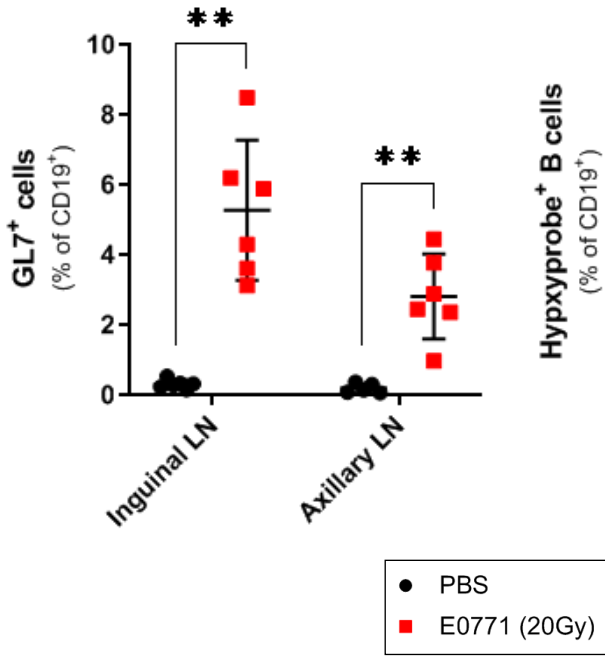**B**

C57BL/6

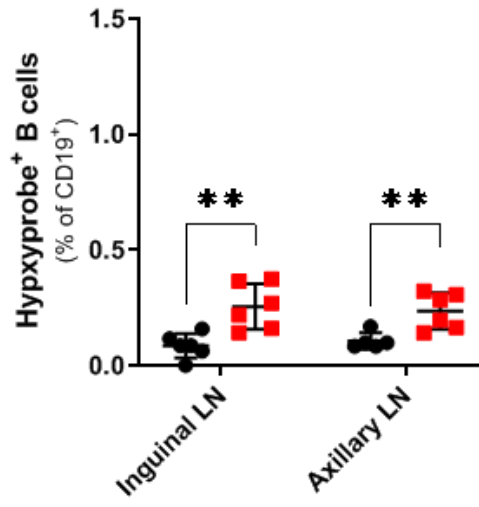

Naïve

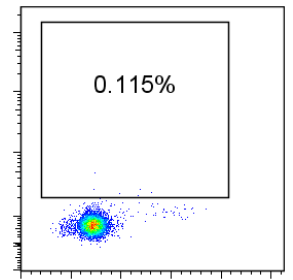

E0771 (20Gy)

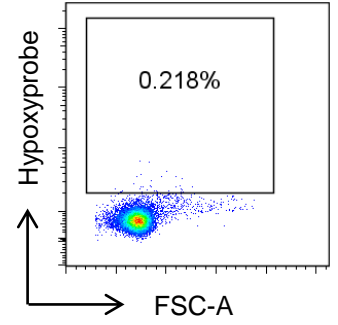**C**

C57BL/6

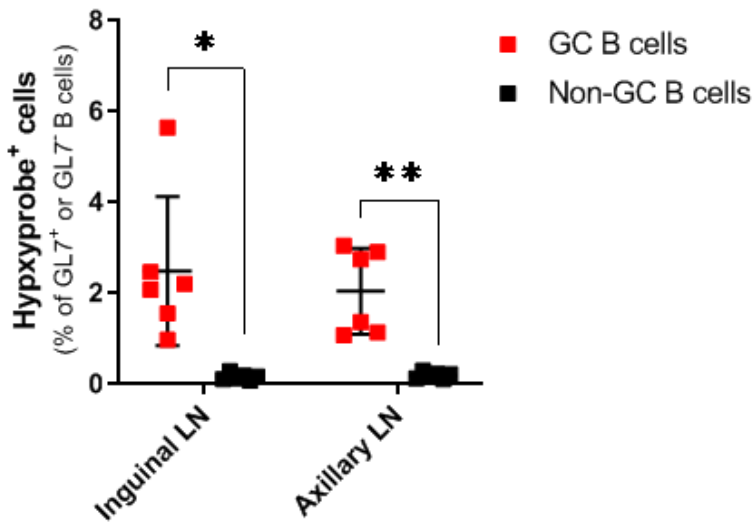

E0771 (20Gy)

GC B cells

Non-GC B cells

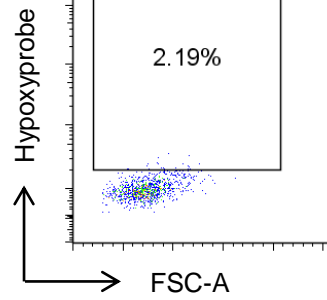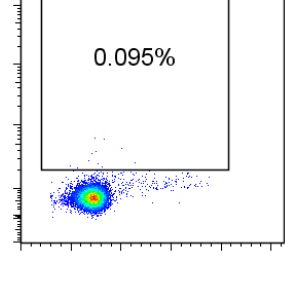

**A**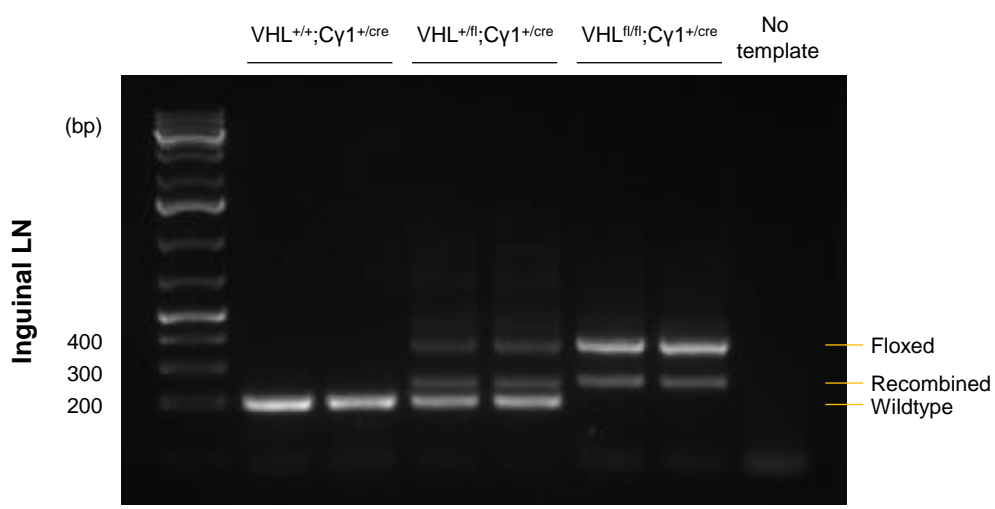**B**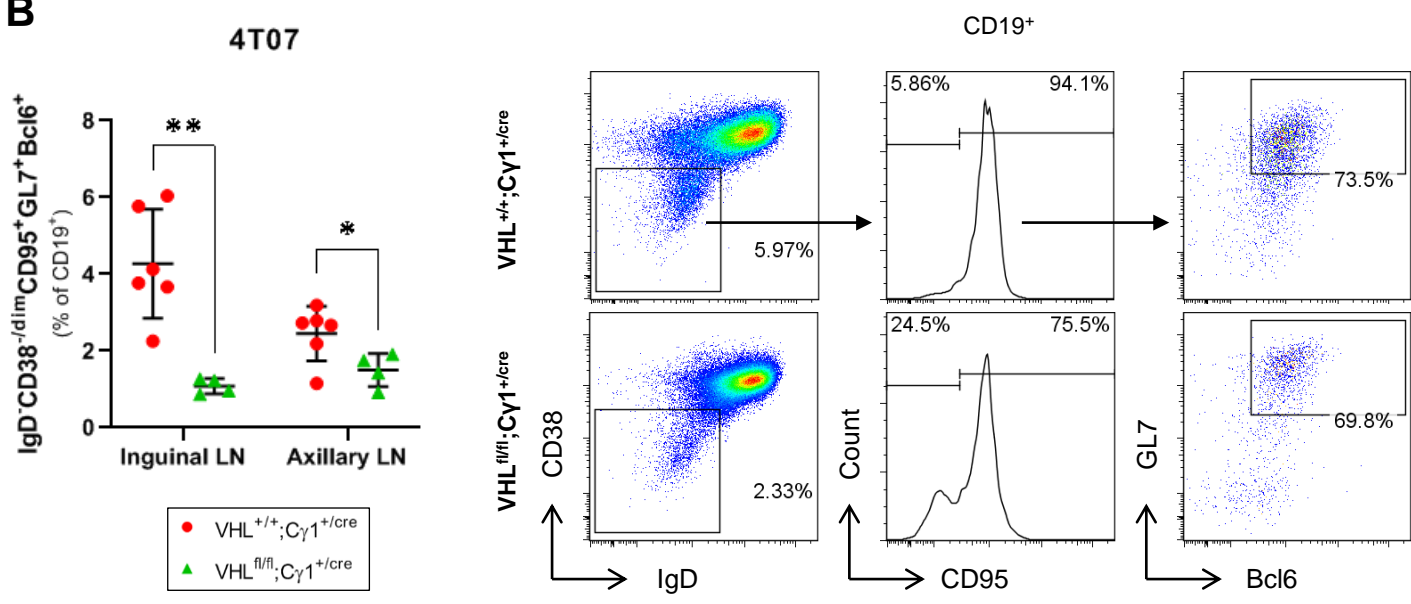**C**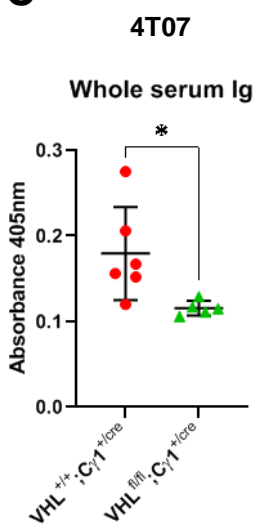**D**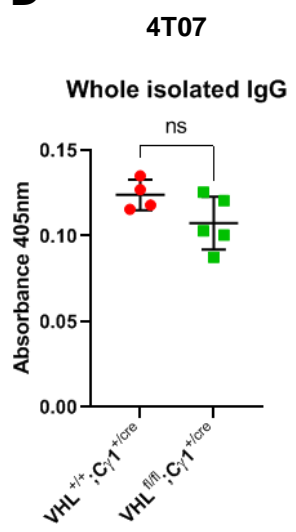**E**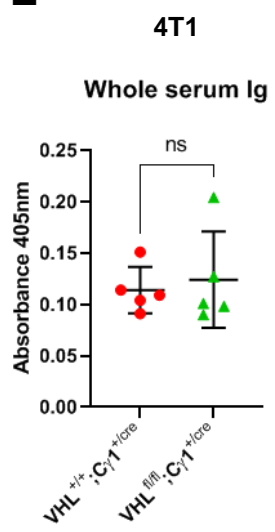

Supplemental Figure 4

**A**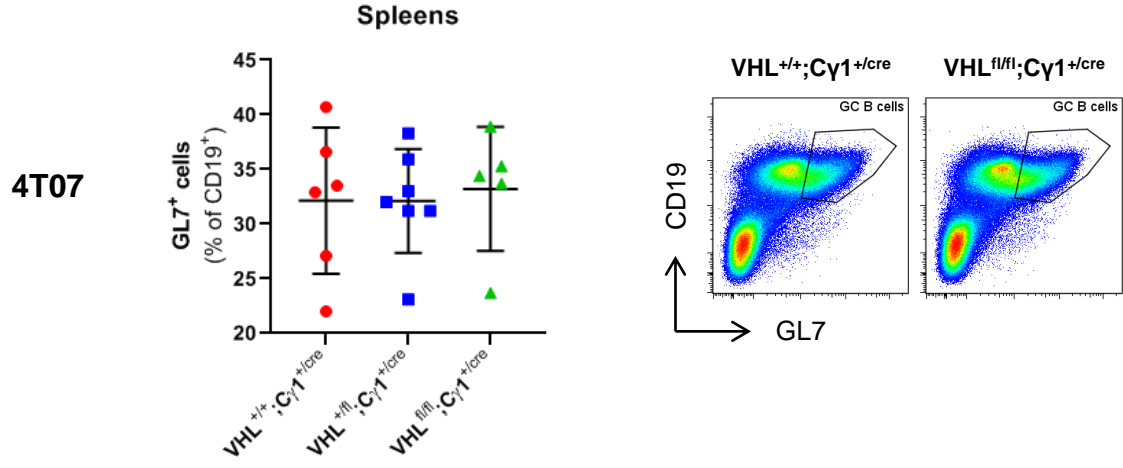**B**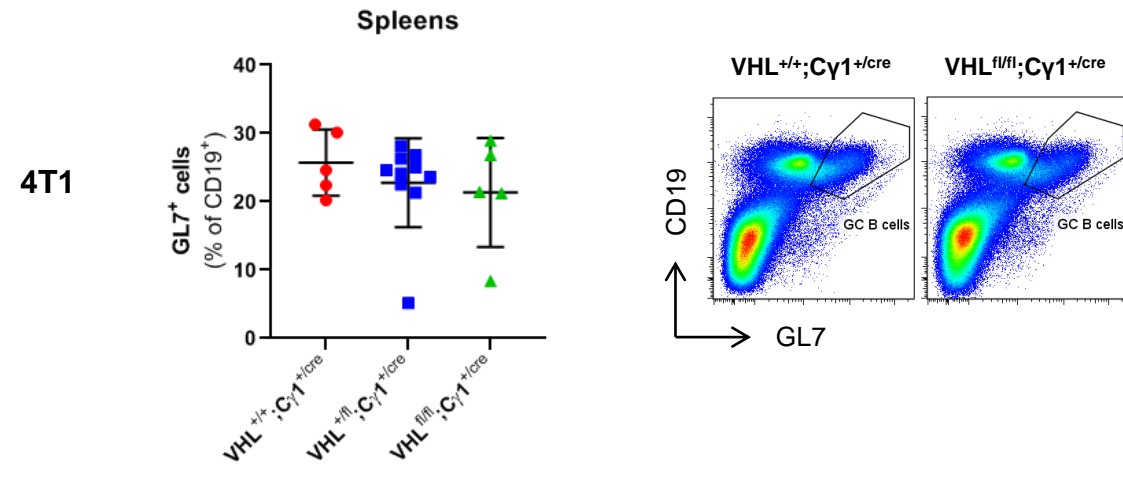**C**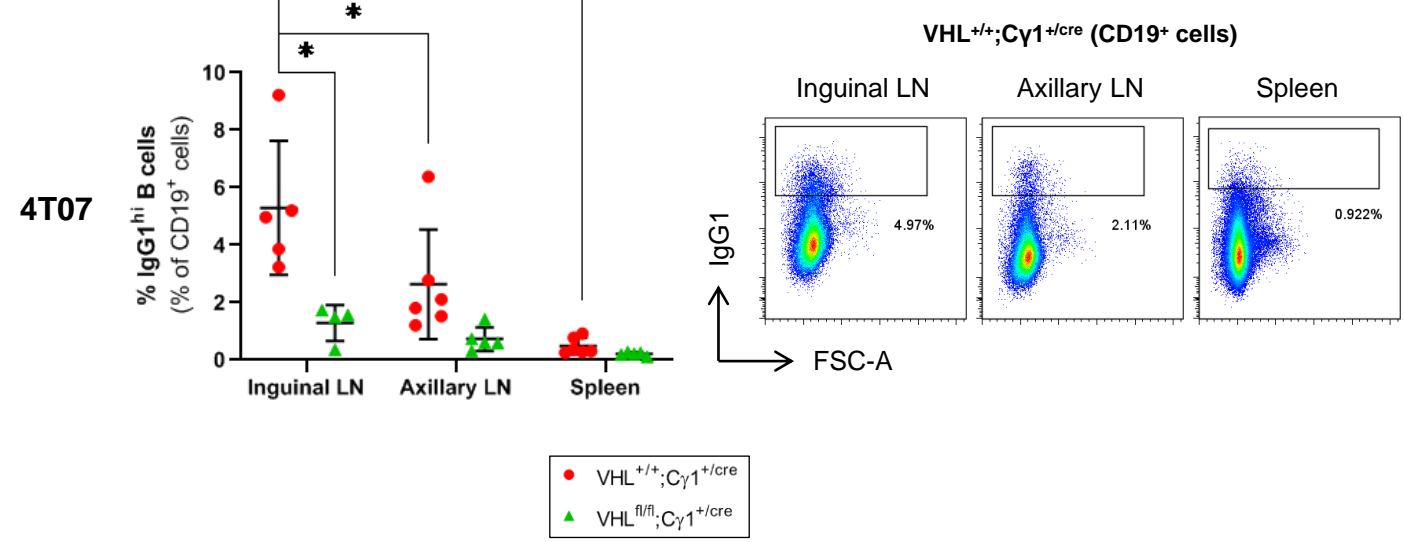**D**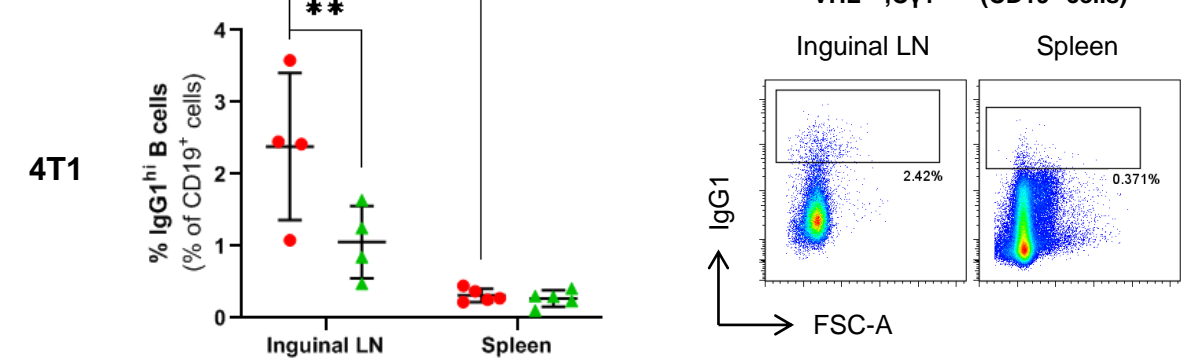**Supplemental Figure 5**

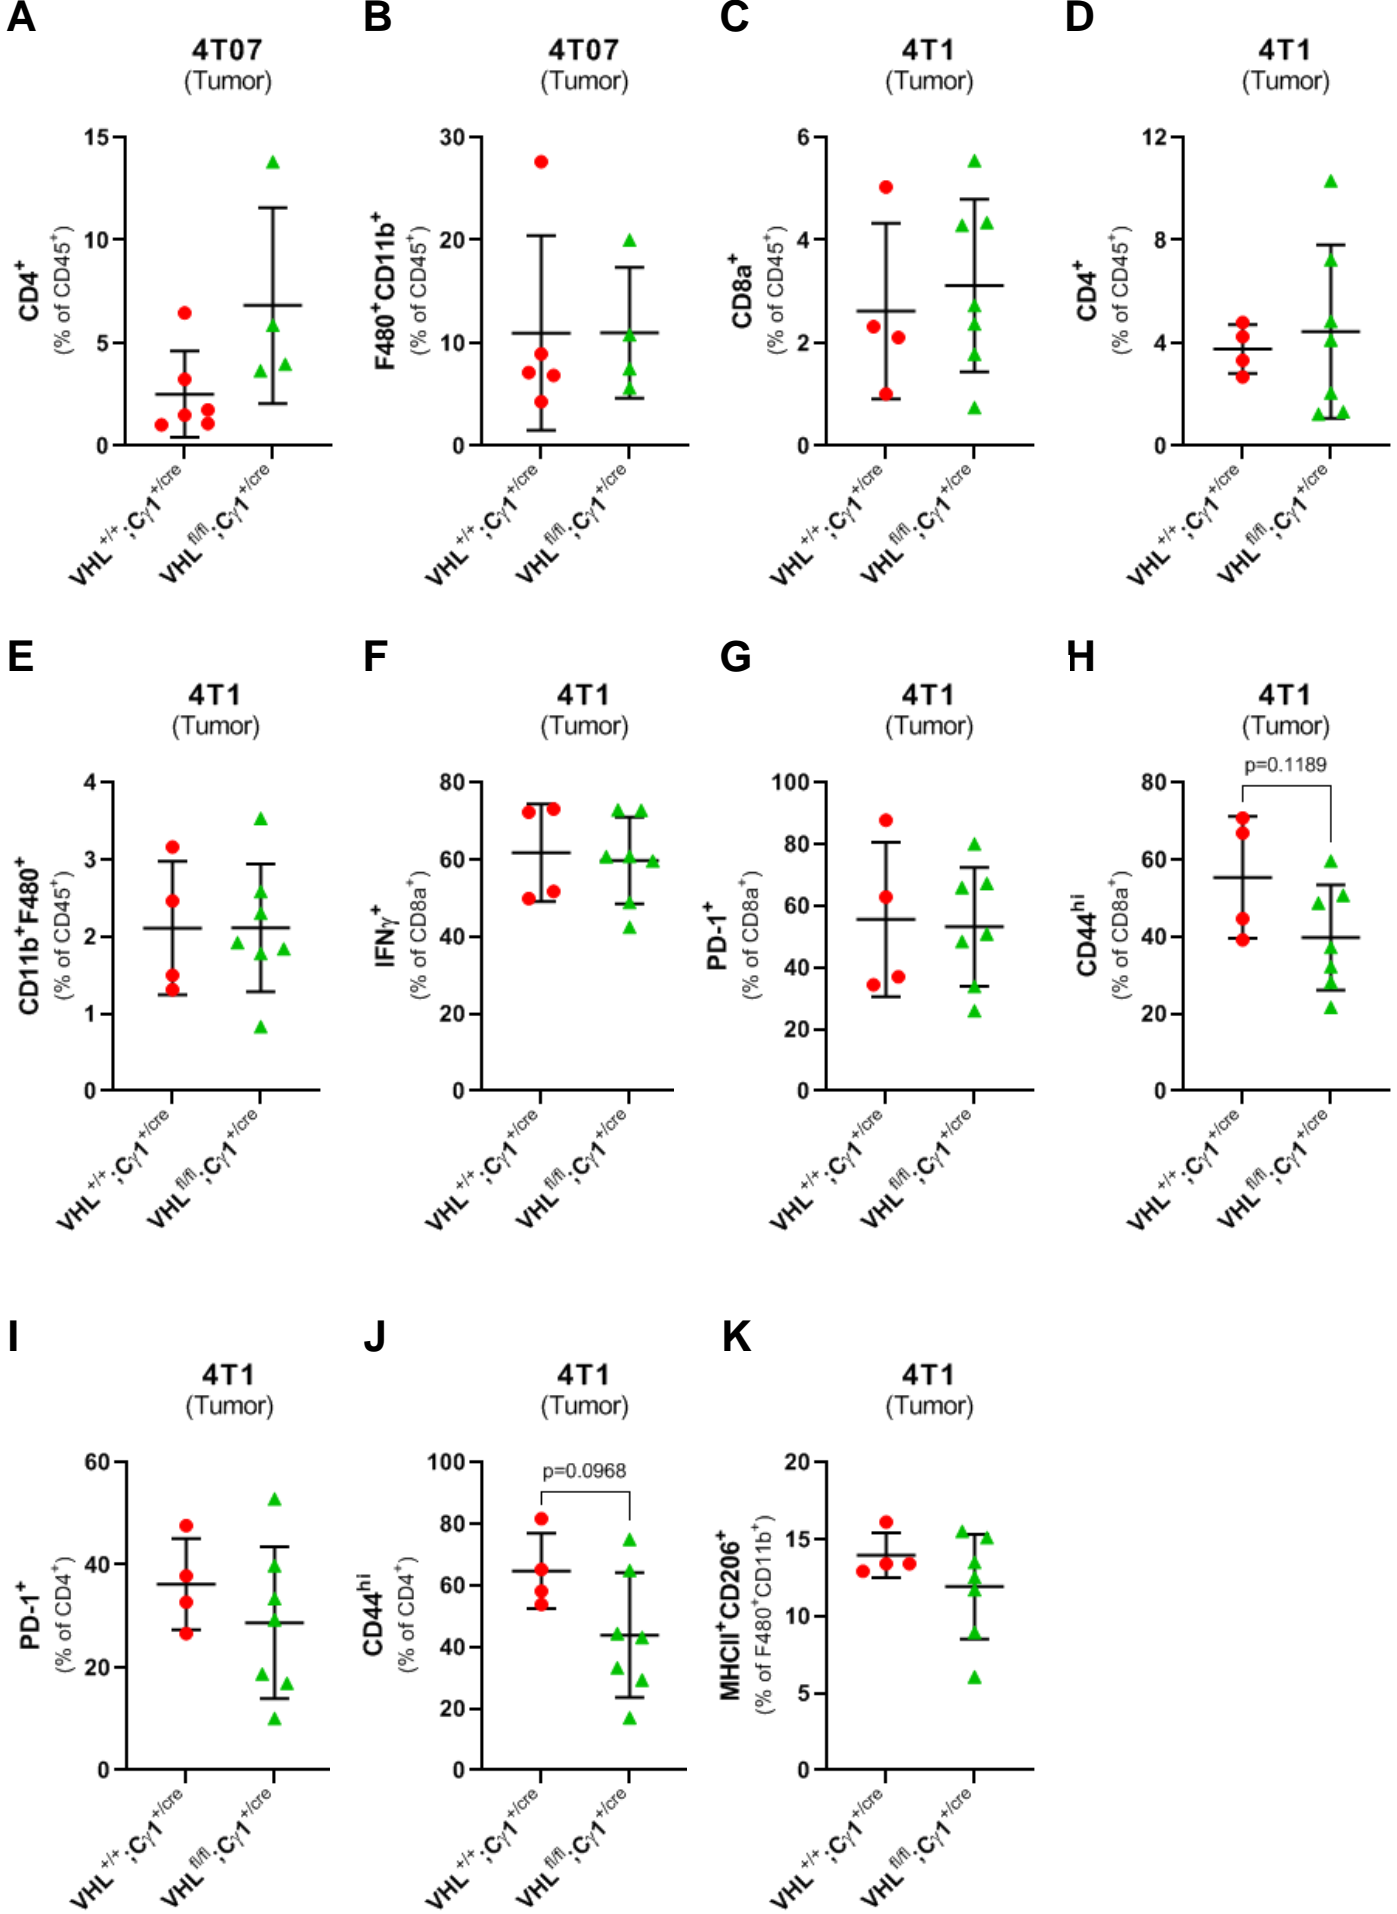

Supplemental Figure 6

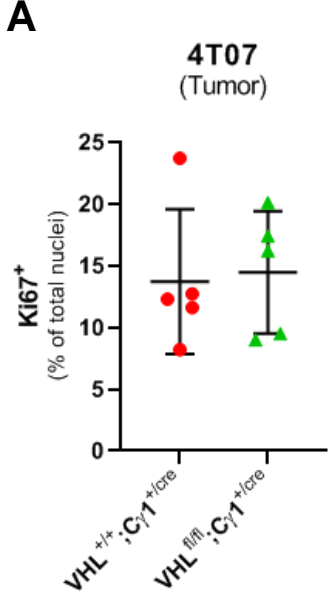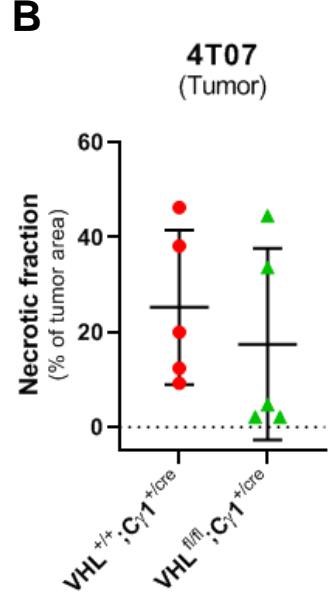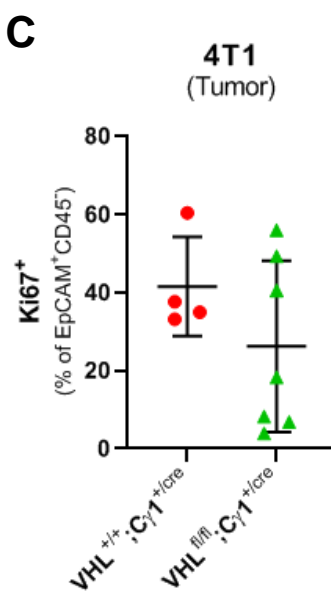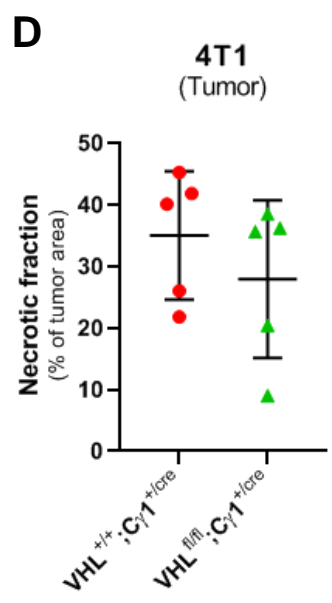

Supplemental Figure 7

| <i>Clinicopathological features</i>       | <b>TNBC node negative<br/>n = 3 (%)</b> | <b>TNBC node positive<br/>n = 3 (%)</b> |
|-------------------------------------------|-----------------------------------------|-----------------------------------------|
| <i>Age at diagnosis</i>                   |                                         |                                         |
| < 50 years                                | 1 (33)                                  | 2 (67)                                  |
| ≥ 50 years                                | 2 (67)                                  | 1 (33)                                  |
| <i>Histological description</i>           |                                         |                                         |
| ▪ Infiltrating duct. carcinoma            | 3 (100)                                 | 3 (100)                                 |
| <i>Histological grade</i>                 |                                         |                                         |
| 1                                         | 0                                       | 0                                       |
| 2                                         | 0                                       | 0                                       |
| 3                                         | 3 (100)                                 | 3 (100)                                 |
| <i>Pathological tumor classification*</i> |                                         |                                         |
| 1C                                        | 3 (100)                                 | 1 (33)                                  |
| 2                                         | 0                                       | 1 (33)                                  |
| 3                                         | 0                                       | 1 (33)                                  |
| <i>Pathological LN classification**</i>   |                                         |                                         |
| 1A                                        | 0                                       | 1 (33)                                  |
| 2A                                        | 0                                       | 2 (67)                                  |
| 3A                                        | 0                                       | 0                                       |

\*1C: greatest dimension >1cm and ≤2cm; 2: greatest dimension >2cm and ≤5cm; 3: greatest dimension >5cm

\*\*1A: Metastasis in 1 to 3 axillary lymph nodes; 2A: Metastasis in 4 to 9 axillary lymph nodes, at least one deposit >2.0mm; 3A: Metastasis in 10 or more axillary lymph nodes (at least one tumor deposit >2.0mm); or metastases to the infraclavicular (level III) axillary lymph nodes
